# Supplementary material
Source: Hindawi journal article supplement (doi:10.1155/2012/141240)

**Fig. S1**  
Cytotoxicity after lipid incubation

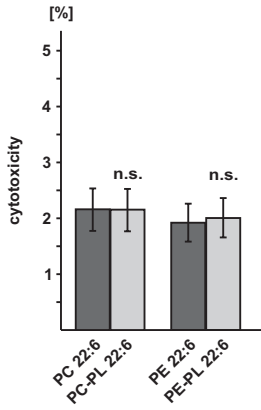

**Fig. S2**  
Control of specificity in  $\alpha$ -secretase assay

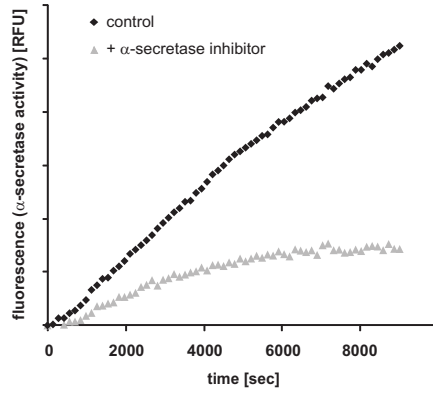

**Fig. S3**  
Control of specificity in  $\beta$ -secretase assay

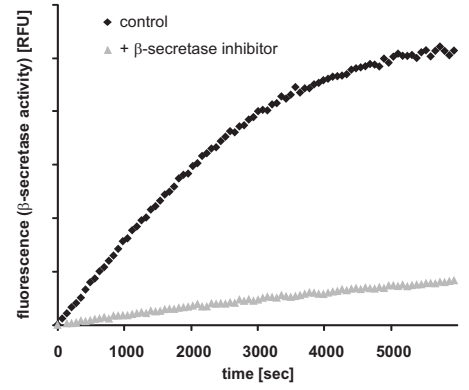

**Fig. S4**  
Control of specificity in  $\gamma$ -secretase assay

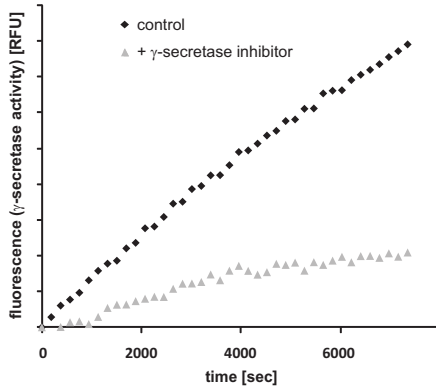

Supplement: f1 [file 141240.f1.pdf]
